# Supplementary material for: Effect of a Child-Owned Poultry Intervention Providing Eggs on Nutrition Status and Motor Skills of Young Children in Southern Ethiopia: A Cluster Randomized and Controlled Community Trial
Source: MDPI journal article supplement (doi:10.3390/ijerph192215305), 2022-11-19
Supplement: s1 [file s1]

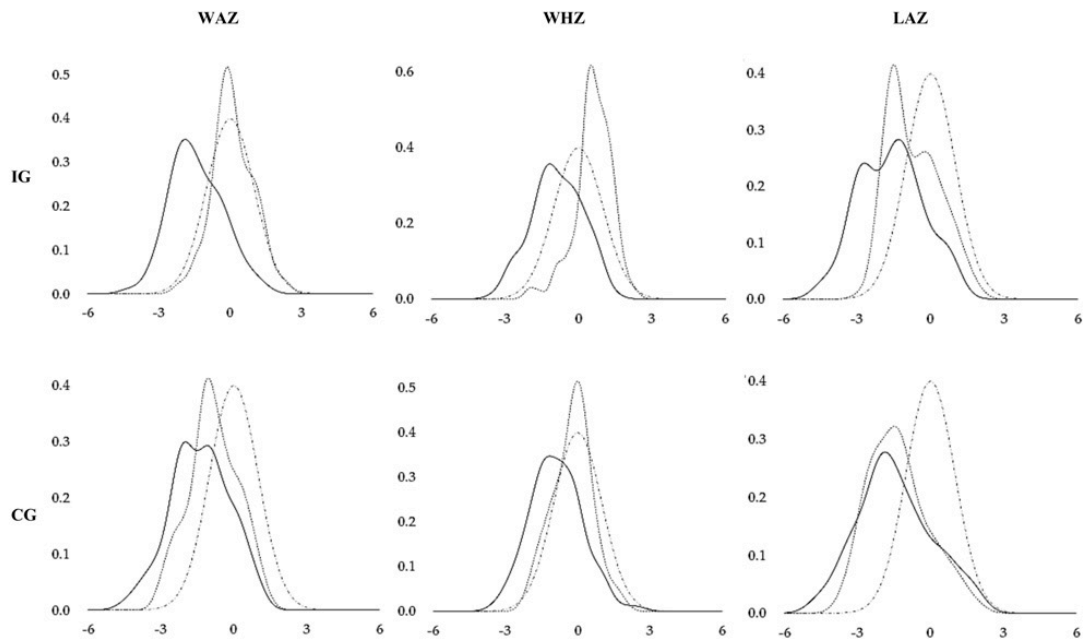

**Supplemental Figure S1.** Distribution of anthropometric z-scores among children compared with WHO standards (dashed). IG = Intervention group; CG = Control group. WAZ= weight for age Z-score; WHZ = weight for height (length) Z-score; LAZ = length for age Z-score. Baseline is solid line, end line is dotted line.

**Supplemental Table S1.** Comparison of intervention effect on nutritional status among treatment and control groups by GEE different correlation matrices.

|                  | Baseline                     |                    | End line                     |                    | Significance testing          |          |                                      |          |                                       |          |
|------------------|------------------------------|--------------------|------------------------------|--------------------|-------------------------------|----------|--------------------------------------|----------|---------------------------------------|----------|
|                  | Interven-<br>tion<br>(N=122) | Control<br>(N=121) | Interven-<br>tion<br>(N=122) | Control<br>(N=121) | Correlation matrix:<br>AR     |          | Correlation matrix: In-<br>dependent |          | Correlation matrix: Ex-<br>changeable |          |
|                  | Mean<br>(SD)                 | Mean<br>(SD)       | Mean<br>(SD)                 | Mean<br>(SD)       | $\beta$ (95% CI) <sup>a</sup> | <i>p</i> | $\beta$ (95% CI) <sup>a</sup>        | <i>p</i> | $\beta$ (95% CI) <sup>a</sup>         | <i>p</i> |
| WAZ              | -1.12<br>(1.00)              | -1.02<br>(1.17)    | -0.20<br>(0.86)              | -1.09<br>(1.05)    | 0.38 (0.13, 0.63)             | 0.003    | 0.27 (0.02, 0.52)                    | 0.033    | 0.27 (0.02, 0.52)                     | 0.034    |
| LAZ              | -1.32<br>(1.19)              | -1.10<br>(1.48)    | -1.04<br>(1.04)              | -1.58<br>(1.25)    | 0.15 (-0.15, 0.44)            | 0.325    | 0.10 (-0.18, 0.39)                   | 0.473    | 0.11 (-0.17, 0.39)                    | 0.450    |
| WHZ              | -0.65<br>(0.97)              | -0.63<br>(1.03)    | 0.43<br>(0.79)               | -0.40<br>(0.89)    | 0.43 (0.21, 0.64)             | <0.001   | 0.45 (0.24, 0.66)                    | <0.001   | 0.45 (0.24, 0.67)                     | <0.001   |
|                  | N (%)                        | N (%)              | N (%)                        | N (%)              | OR (95% CI) <sup>b</sup>      | <i>p</i> | OR (95% CI) <sup>b</sup>             | <i>p</i> | OR (95% CI) <sup>b</sup>              | <i>p</i> |
| Under-<br>weight | 22 (18)                      | 24 (19.8)          | 6 (4.9)                      | 22 (18.2)          | 0.46 (0.26, 0.84)             | 0.011    | 0.52 (0.29, 0.94)                    | 0.031    | 0.52 (0.28, 0.94)                     | 0.03     |
| Stunting         | 35 (28.7)                    | 37 (30.6)          | 41 (33.6)                    | 50 (41.3)          | 0.58 (0.37, 0.91)             | 0.017    | 0.58 (0.37, 0.91)                    | 0.019    | 0.58 (0.37, 0.91)                     | 0.018    |
| Wasting          | 11 (9)                       | 10 (8.3)           | 1 (0.8)                      | 6 (5)              | 0.52 (0.26, 1.05)             | 0.067    | 0.52 (0.26, 1.04)                    | 0.066    | 0.52 (0.26, 1.05)                     | 0.068    |

AR: Auto-regressive; OR: Odds ratio; WAZ: Weight for age Z-score; LAZ: Length for age Z-score; WHZ: Weight for height Z-score. <sup>a</sup>Calculated by GEE linear model. <sup>b</sup>Calculated by GEE binary logit adjusted for baseline corresponding Z-score.
